# Supplementary material for: Meirols A–C: Bioactive Catecholic Compounds from the Marine-Derived Fungus Meira sp. 1210CH-42
Source: MDPI journal article supplement (doi:10.3390/md22020087), 2024-02-14
Supplement: s1 [file s1]

## **Meirols A–C: Bioactive Catecholic Compounds from the Marine-Derived Fungus *Meira* sp. 1210CH-42**

**Min Ah Lee <sup>1,2</sup>, Jong Soon Kang <sup>3</sup>, Jeong-Wook Yang <sup>3</sup>, Hwa-Sun Lee <sup>1,2</sup>, Chang-Su Heo <sup>1,4</sup>, Sun Joo Park <sup>2</sup>, and Hee Jae Shin <sup>1,4,\*</sup>**

<sup>1</sup>Marine Natural Products Chemistry Laboratory, Korea Institute of Ocean Science and Technology, 385 Haeyang-ro, Yeongdo-gu, Busan 49111, Republic of Korea; minah@kiost.ac.kr (M.A.L.); hwasunlee@kiost.ac.kr (H.-S.L.)

<sup>2</sup>Department of Chemistry, Pukyong National University, 45 Yongso-ro, Nam-Gu, Busan 48513, Republic of Korea; parksj@pknu.ac.kr (S.J.P.)

<sup>3</sup>Laboratory Animal Resource Center, Korea Research Institute of Bioscience and Biotechnology, 30 Yeongudanji-ro, Cheongwon-gu, Cheongju 28116, Republic of Korea; kanjon@kribb.re.kr (J.S.K.); z7v8@kribb.re.kr (J.-W.Y.)

<sup>4</sup>Department of Marine Biotechnology, University of Science and Technology (UST), 217 Gajungro, Yuseong-gu, Daejeon 34113, Republic of Korea; science30@kiost.ac.kr (C.-S.H.)

\*Correspondence: shinhj@kiost.ac.kr; Tel.: +82-51-664-3341; Fax: +82-51-664-3340

# Contents

|                                                                                                           |    |
|-----------------------------------------------------------------------------------------------------------|----|
| Figure S1. $^1\text{H}$ NMR spectrum of 1 in $\text{CD}_3\text{OD}$ (600 MHz).                            | 3  |
| Figure S2. $^{13}\text{C}$ NMR spectrum of 1 in $\text{CD}_3\text{OD}$ (150 MHz).                         | 3  |
| Figure S3. HSQC spectrum of 1 in $\text{CD}_3\text{OD}$ .                                                 | 4  |
| Figure S4. COSY spectrum of 1 in $\text{CD}_3\text{OD}$ .                                                 | 4  |
| Figure S5. HMBC spectrum of 1 in $\text{CD}_3\text{OD}$ .                                                 | 5  |
| Figure S6. HR-ESIMS spectrum of 1.                                                                        | 6  |
| Figure S7. $^1\text{H}$ NMR spectrum of 2 in $\text{CD}_3\text{OD}$ (600 MHz).                            | 7  |
| Figure S8. $^{13}\text{C}$ NMR spectrum of 2 in $\text{CD}_3\text{OD}$ (150 MHz).                         | 7  |
| Figure S9. HSQC spectrum of 2 in $\text{CD}_3\text{OD}$ .                                                 | 8  |
| Figure S10. COSY spectrum of 2 in $\text{CD}_3\text{OD}$ .                                                | 8  |
| Figure S11. HMBC spectrum of 2 in $\text{CD}_3\text{OD}$ .                                                | 9  |
| Figure S12. HR-ESIMS spectrum of 2.                                                                       | 10 |
| Figure S13. UV spectrum of 2.                                                                             | 11 |
| Figure S14. IR spectrum of 2.                                                                             | 12 |
| Figure S15. $^1\text{H}$ NMR spectrum of 3 in $\text{CD}_3\text{OD}$ (600 MHz).                           | 13 |
| Figure S16. $^{13}\text{C}$ NMR spectrum of 3 in $\text{CD}_3\text{OD}$ (150 MHz).                        | 13 |
| Figure S17. HSQC spectrum of 3 in $\text{CD}_3\text{OD}$ .                                                | 14 |
| Figure S18. COSY spectrum of 3 in $\text{CD}_3\text{OD}$ .                                                | 14 |
| Figure S19. HMBC spectrum of 3 in $\text{CD}_3\text{OD}$ .                                                | 15 |
| Figure S20. HR-ESIMS spectrum of 3.                                                                       | 16 |
| Figure S21. UV spectrum of 3.                                                                             | 17 |
| Figure S22. IR spectrum of 3.                                                                             | 18 |
| Figure S23. $^1\text{H}$ NMR spectrum of 4 in $\text{CD}_3\text{OD}$ (600 MHz).                           | 19 |
| Figure S24. $^{13}\text{C}$ NMR spectrum of 4 in $\text{CD}_3\text{OD}$ (150 MHz).                        | 19 |
| Figure S25. HSQC spectrum of 4 in $\text{CD}_3\text{OD}$ .                                                | 20 |
| Figure S26. COSY spectrum of 4 in $\text{CD}_3\text{OD}$ .                                                | 20 |
| Figure S27. HMBC spectrum of 4 in $\text{CD}_3\text{OD}$ .                                                | 21 |
| Figure S28. HR-ESIMS spectrum of 4.                                                                       | 22 |
| Figure S29. UV spectrum of 4.                                                                             | 23 |
| Figure S30. IR spectrum of 4.                                                                             | 24 |
| Figure S31. Initial geometry optimized conformers of 3.                                                   | 25 |
| Figure S32. Initial geometry optimized conformers of 4.                                                   | 26 |
| Table S1. Total Gibbs Free Energy and Boltzmann population of initial geometry optimized conformers of 3. | 25 |
| Table S2. The cartesian coordinates of conformers of 3.                                                   | 25 |
| Table S3. Total Gibbs Free Energy and Boltzmann population of initial geometry optimized conformers of 4. | 26 |
| Table S4. The cartesian coordinates of conformers of 4.                                                   | 27 |

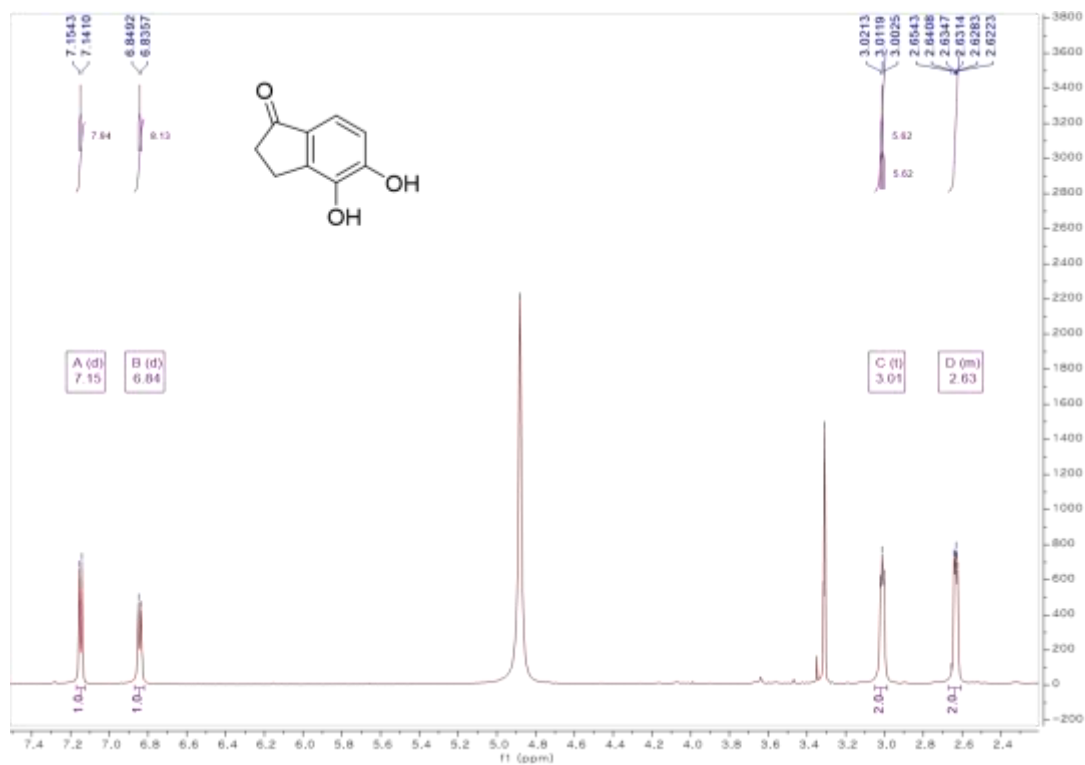

Figure S1. <sup>1</sup>H NMR spectrum of **1** in CD<sub>3</sub>OD (600 MHz).

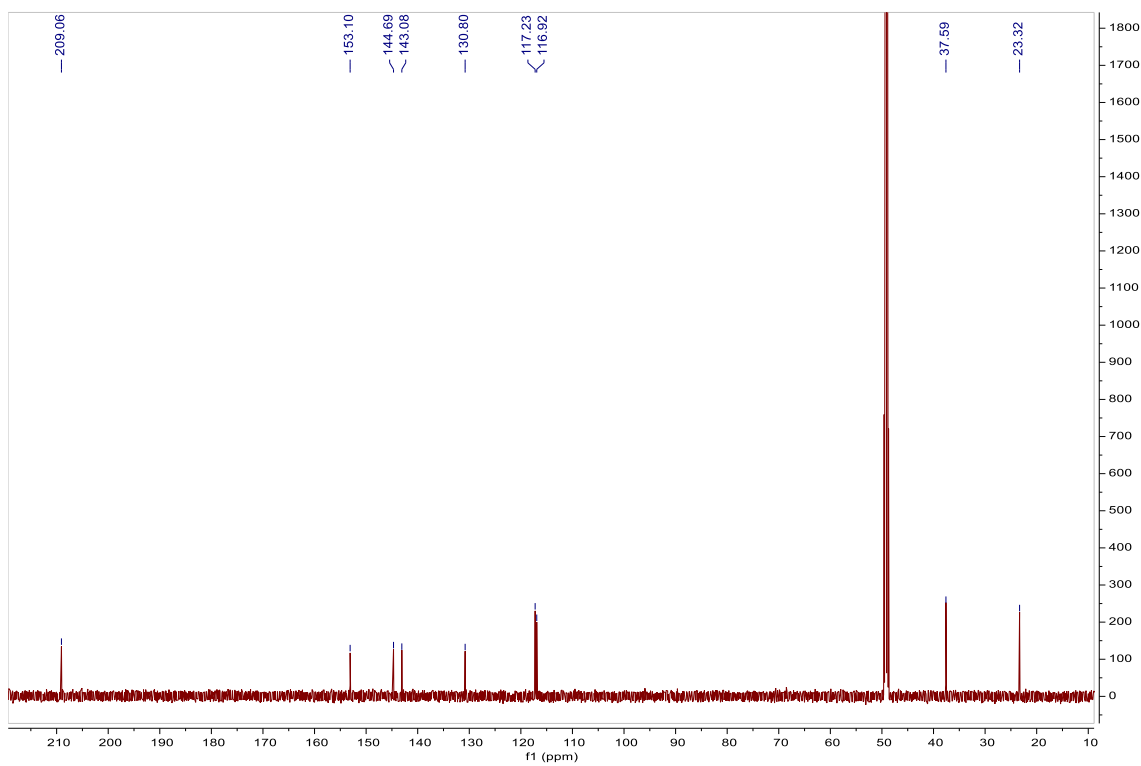

Figure S2. <sup>13</sup>C NMR spectrum of **1** in CD<sub>3</sub>OD (150 MHz).

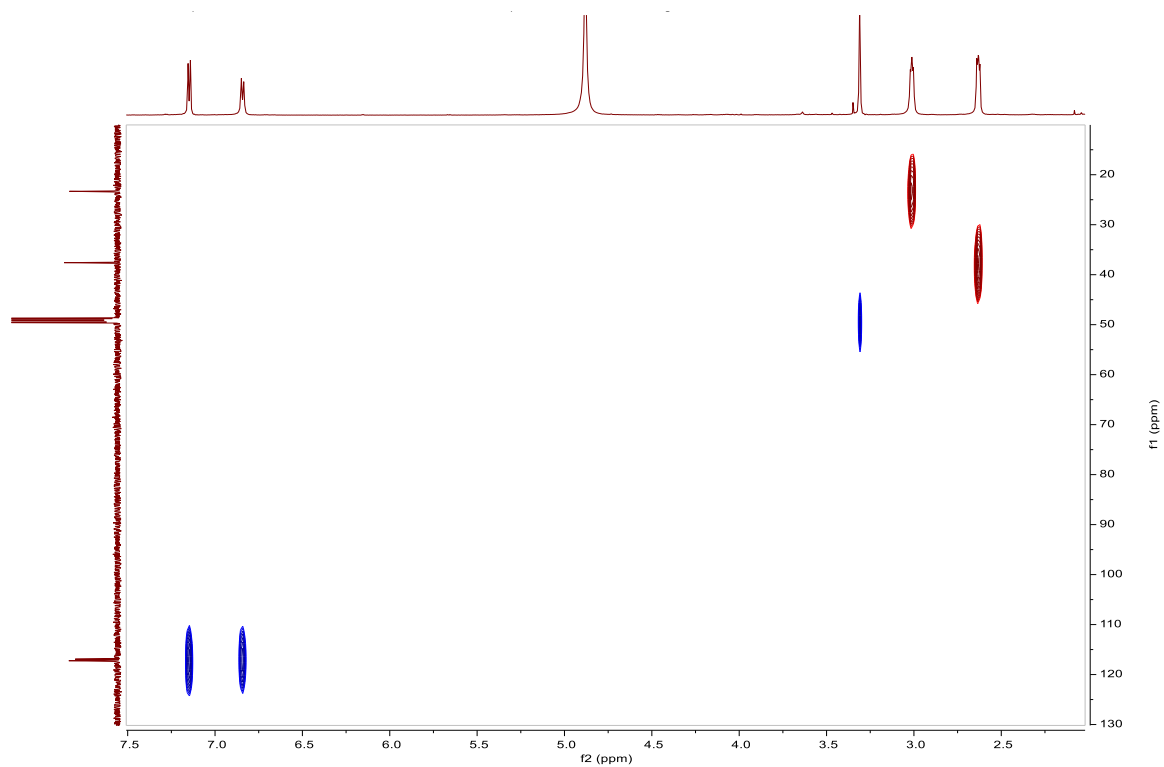

Figure S3. HSQC spectrum of **1** in CD<sub>3</sub>OD.

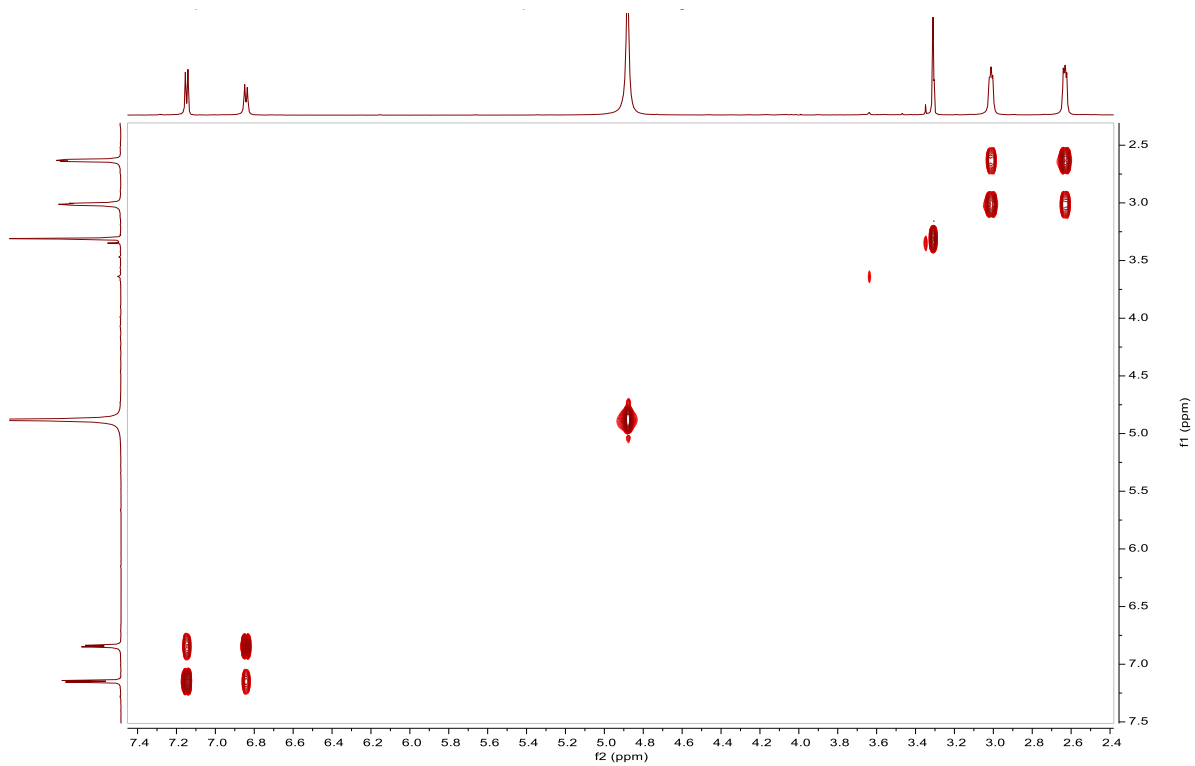

Figure S4. COSY spectrum of **1** in CD<sub>3</sub>OD.

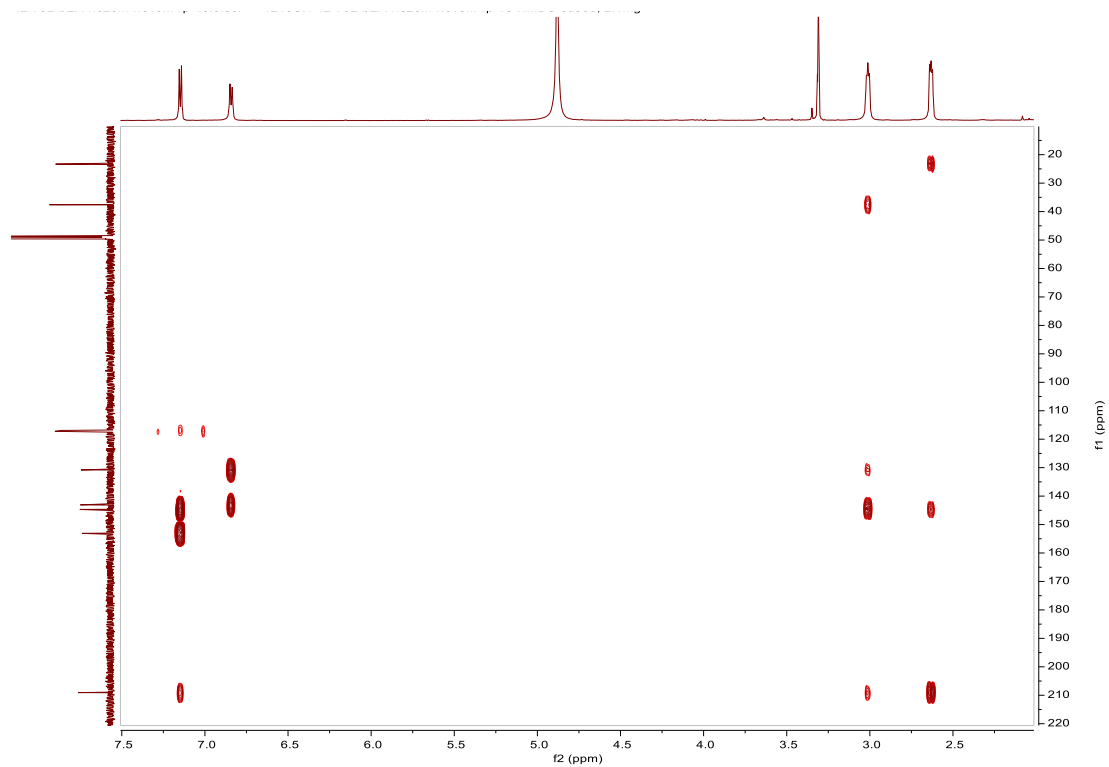

Figure S5. HMBC spectrum of **1** in CD<sub>3</sub>OD.

Sample : 01. 2308-M-A1

(+) ESI-MS

Range : 100-250 m/z

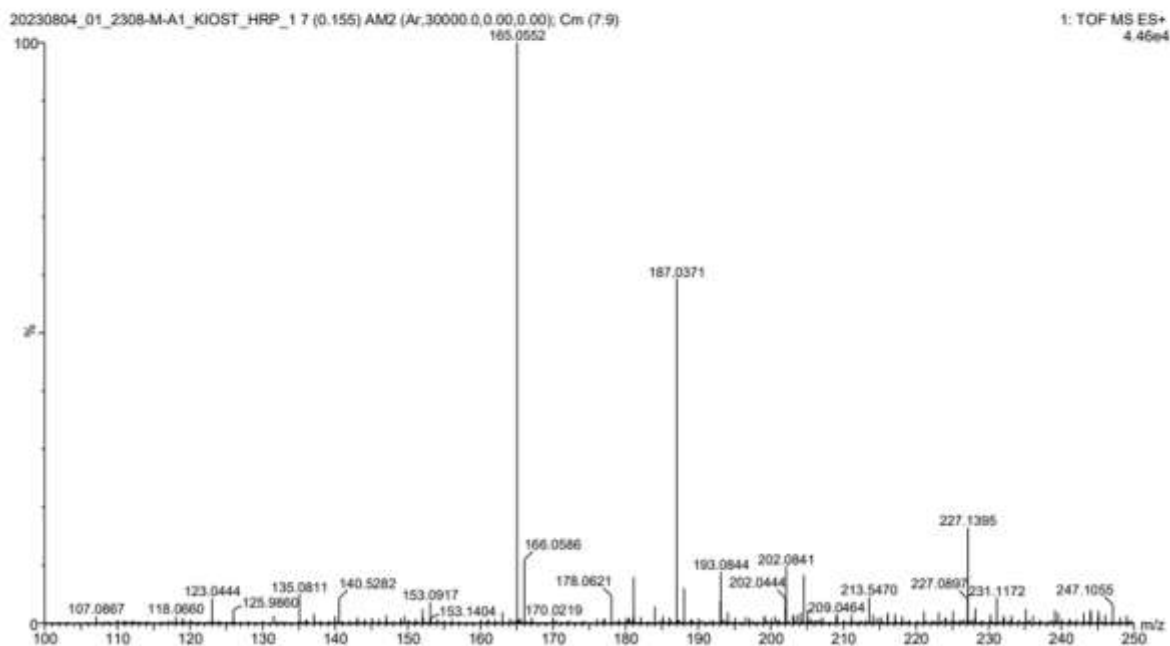

#### Elemental Composition Report

##### Single Mass Analysis

Tolerance = 10.0 PPM / DBE: min = -1.5, max = 50.0

Element prediction: Off

Number of isotope peaks used for i-FIT = 3

##### Monoisotopic Mass, Even Electron Ions

Elements Used:

C: 0-10 H: 0-300 O: 0-5 Na: 0-1 Pt: 0-1

Minimum: -1.5

Maximum: 50.0

| Mass     | Calc. Mass | mDa | PPM | DBE | i-FIT | Norm | Conf(%) | Formula     |
|----------|------------|-----|-----|-----|-------|------|---------|-------------|
| 165.0552 | 165.0552   | 0.0 | 0.0 | 5.5 | 990.7 | n/a  | n/a     | C9 H9 O3    |
| 187.0371 | 187.0371   | 0.0 | 0.0 | 5.5 | 811.3 | n/a  | n/a     | C9 H8 O3 Na |

Figure S6. HR-ESIMS spectrum of **1**.

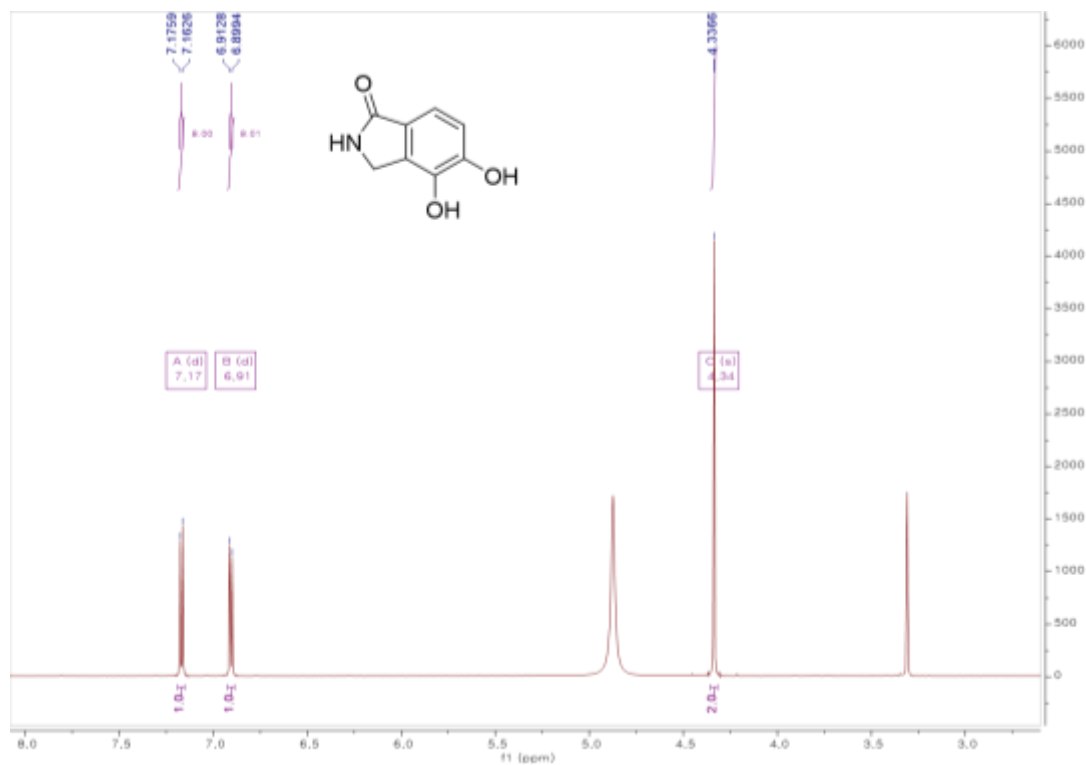

Figure S7. <sup>1</sup>H NMR spectrum of **2** in CD<sub>3</sub>OD (600 MHz).

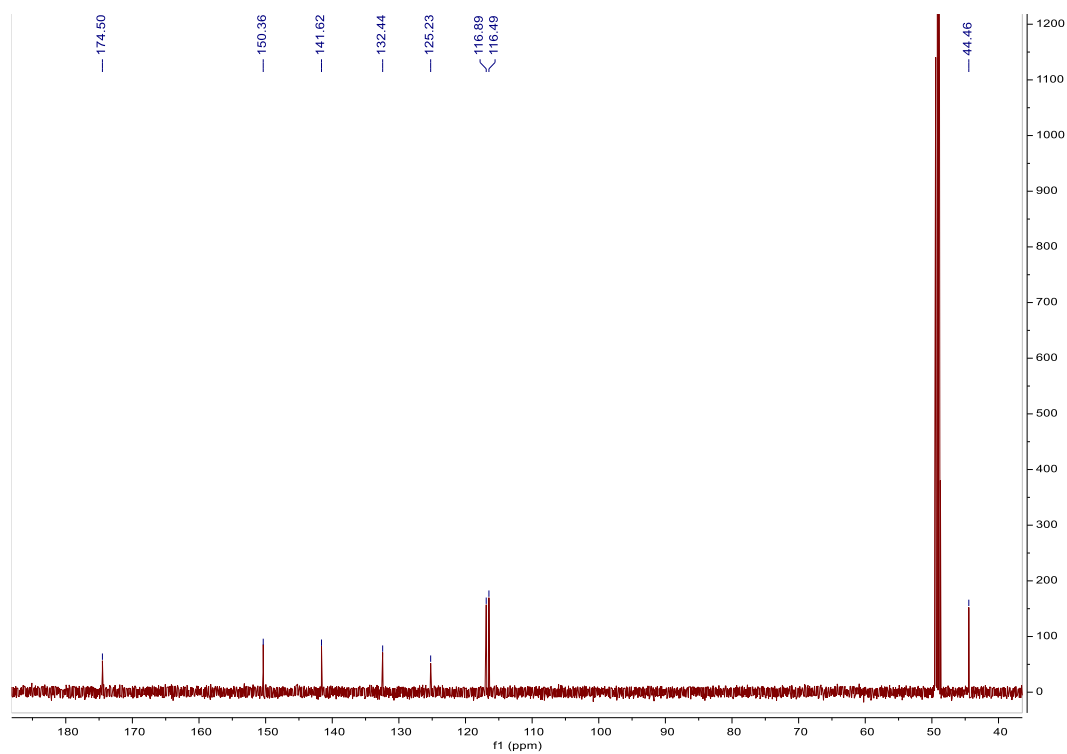

Figure S8. <sup>13</sup>C NMR spectrum of **2** in CD<sub>3</sub>OD (150 MHz).

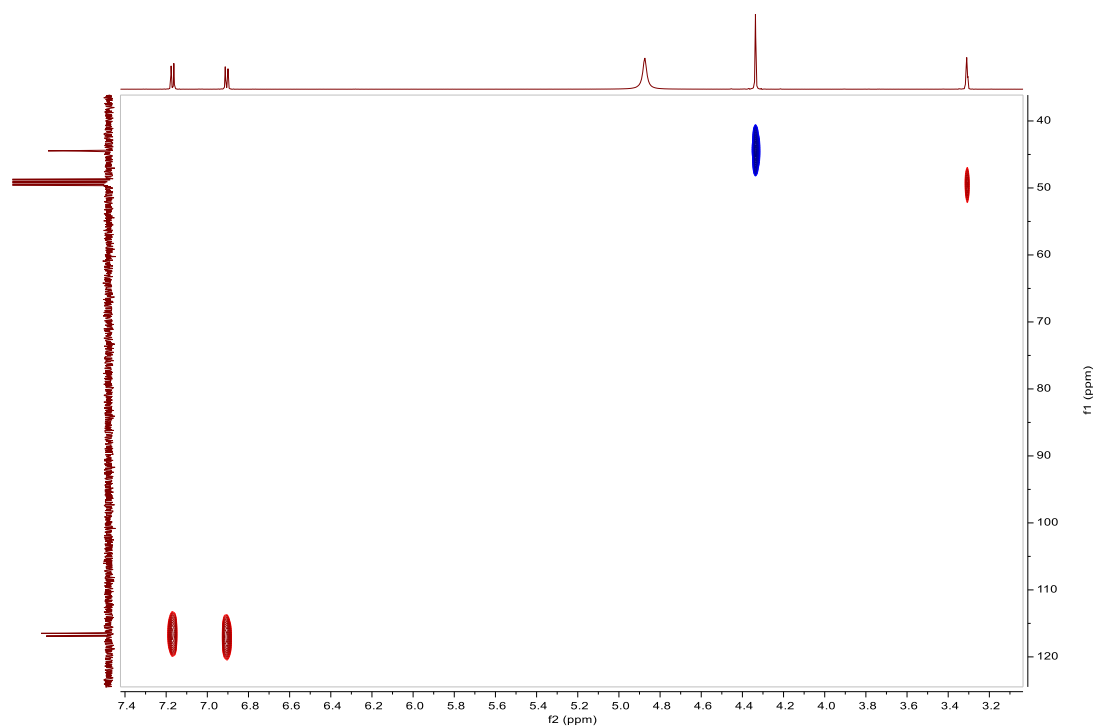

Figure S9. HSQC spectrum of **2** in  $\text{CD}_3\text{OD}$ .

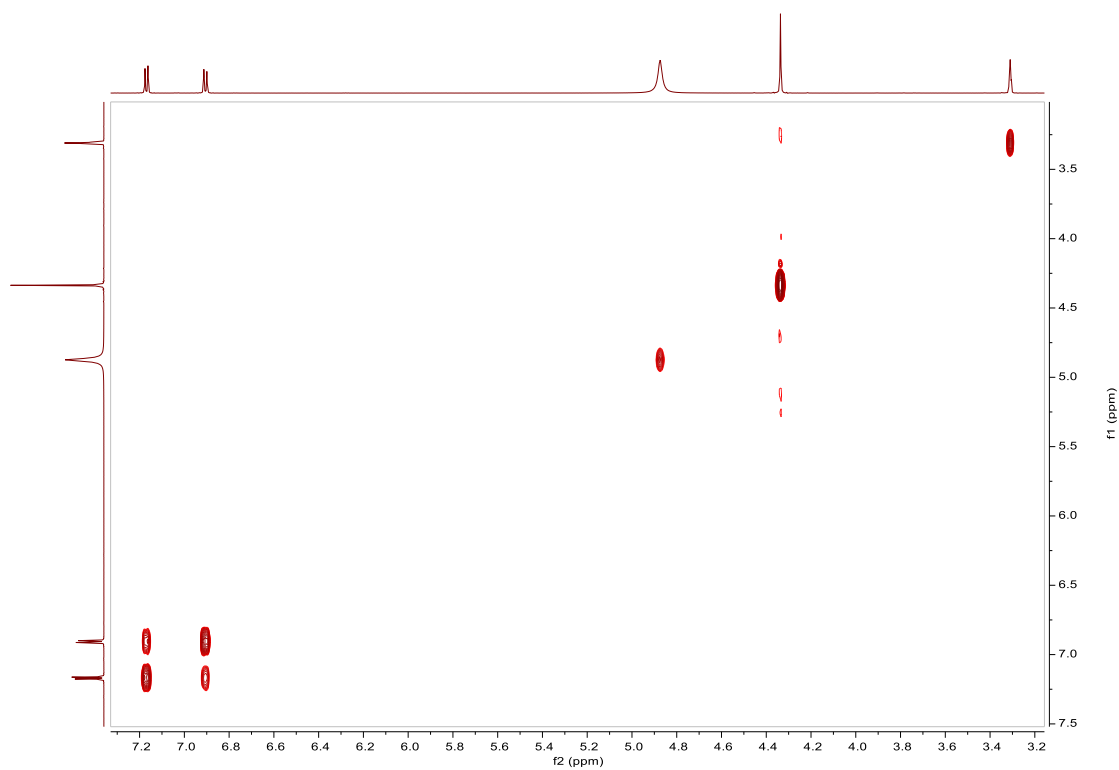

Figure S10. COSY spectrum of **2** in  $\text{CD}_3\text{OD}$ .



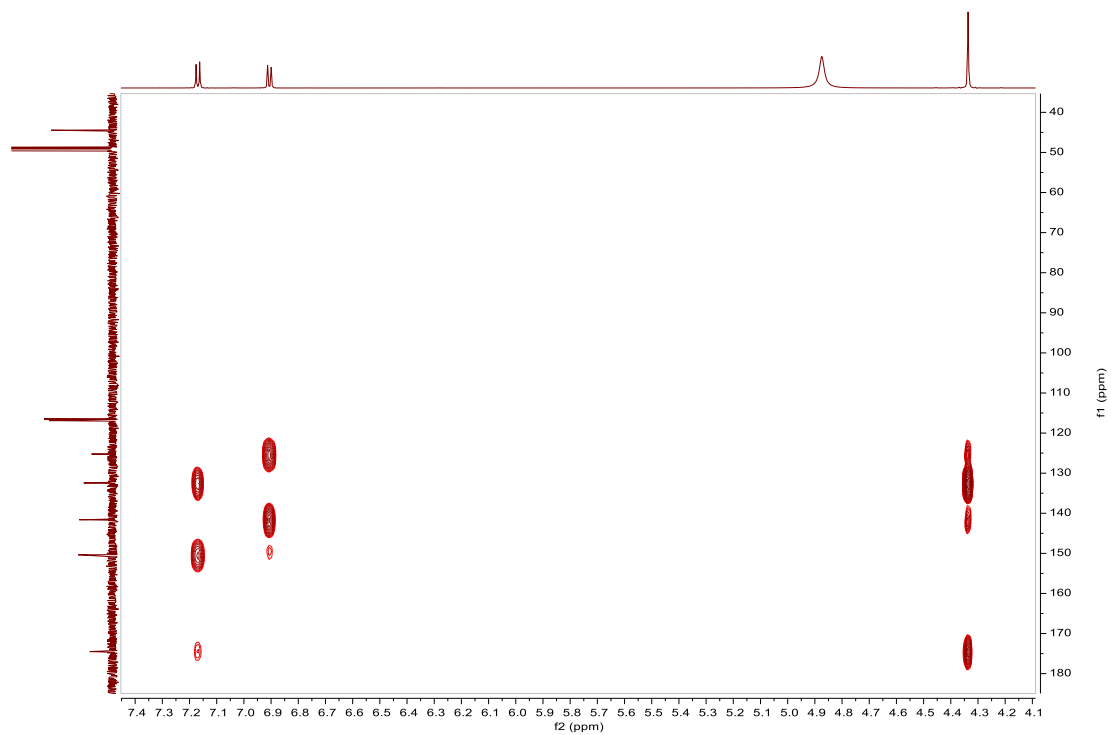

Figure S11. HMBC spectrum of **2** in CD<sub>3</sub>OD.

Sample : 02. 2308-M-A2

(+) ESI-MS

Range : 100-250 m/z

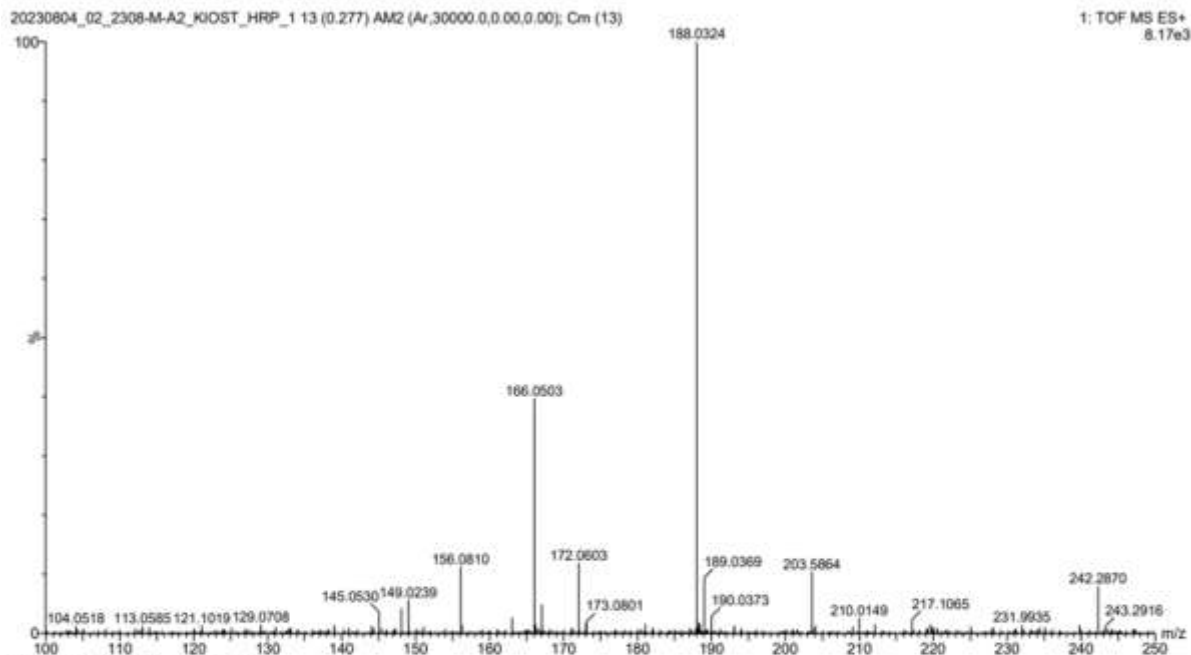

#### Elemental Composition Report

Single Mass Analysis

Tolerance = 10.0 PPM / DBE: min = -1.5, max = 50.0

Element prediction: Off

Number of isotope peaks used for i-FIT = 3

Monoisotopic Mass, Even Electron Ions

Elements Used:

C: 0-10 H: 0-300 N: 0-2 O: 0-5 Na: 0-1 Pt: 0-1

Minimum:

Maximum: 5.0 10.0 -1.5

| Mass     | Calc. Mass | mDa  | PPM  | DBE | i-FIT | Norm | Conf(%) | Formula       |
|----------|------------|------|------|-----|-------|------|---------|---------------|
| 166.0503 | 166.0504   | -0.1 | -0.6 | 5.5 | 227.9 | n/a  | n/a     | C8 H8 N O3    |
| 188.0324 | 188.0324   | 0.0  | 0.0  | 5.5 | 337.1 | n/a  | n/a     | C8 H7 N O3 Na |

Figure S12. HR-ESIMS spectrum of **2**.

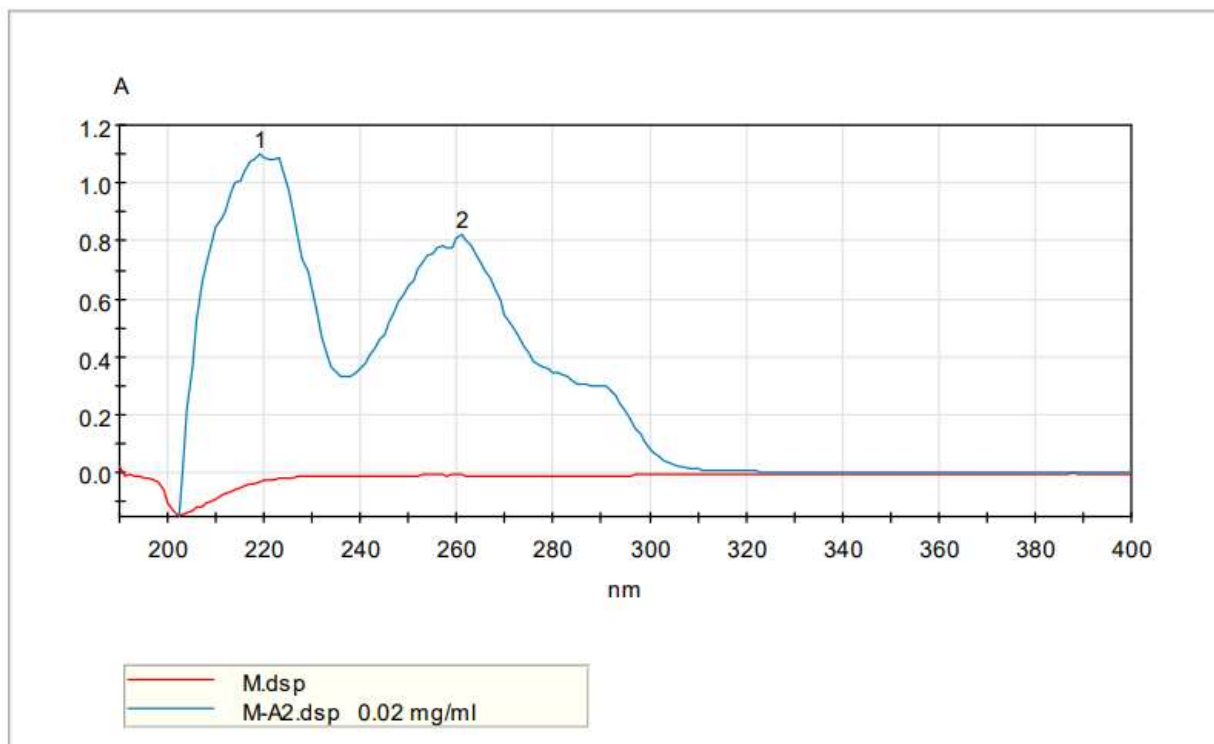

M-A2.dsp 0.02 mg/ml

Maxima Threshold: 0.1 A  
 1 219 nm; 1.100 A 2 261 nm; 0.824 A

M-A2.dsp 0.02 mg/ml  
 290 nm 0.301 A

Figure S13. UV spectrum of **2**.

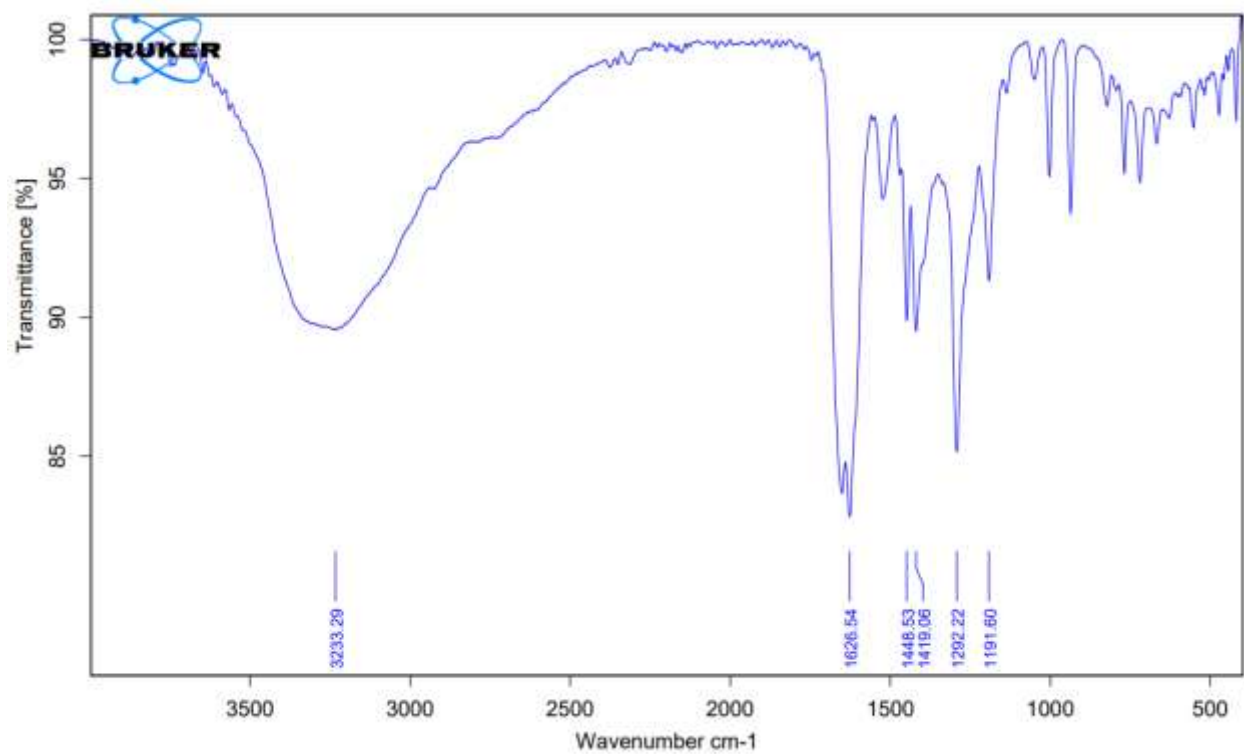

Figure S14. IR spectrum of **2**.

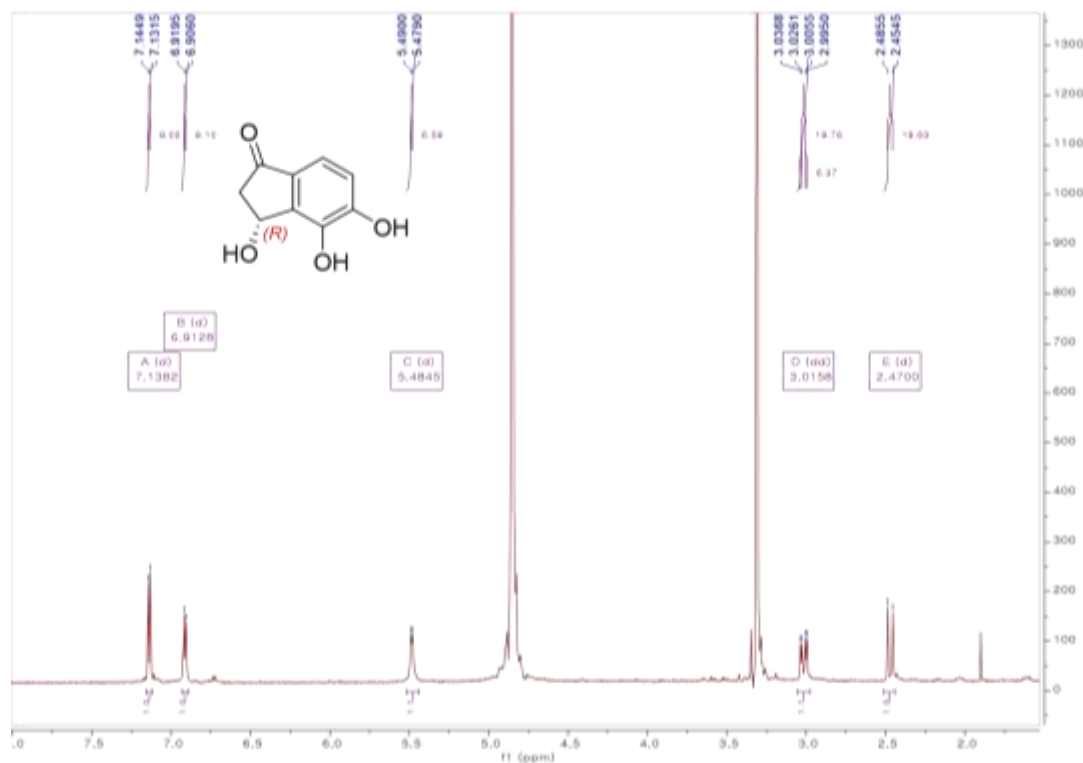

Figure S15. <sup>1</sup>H NMR spectrum of **3** in CD<sub>3</sub>OD (600 MHz).

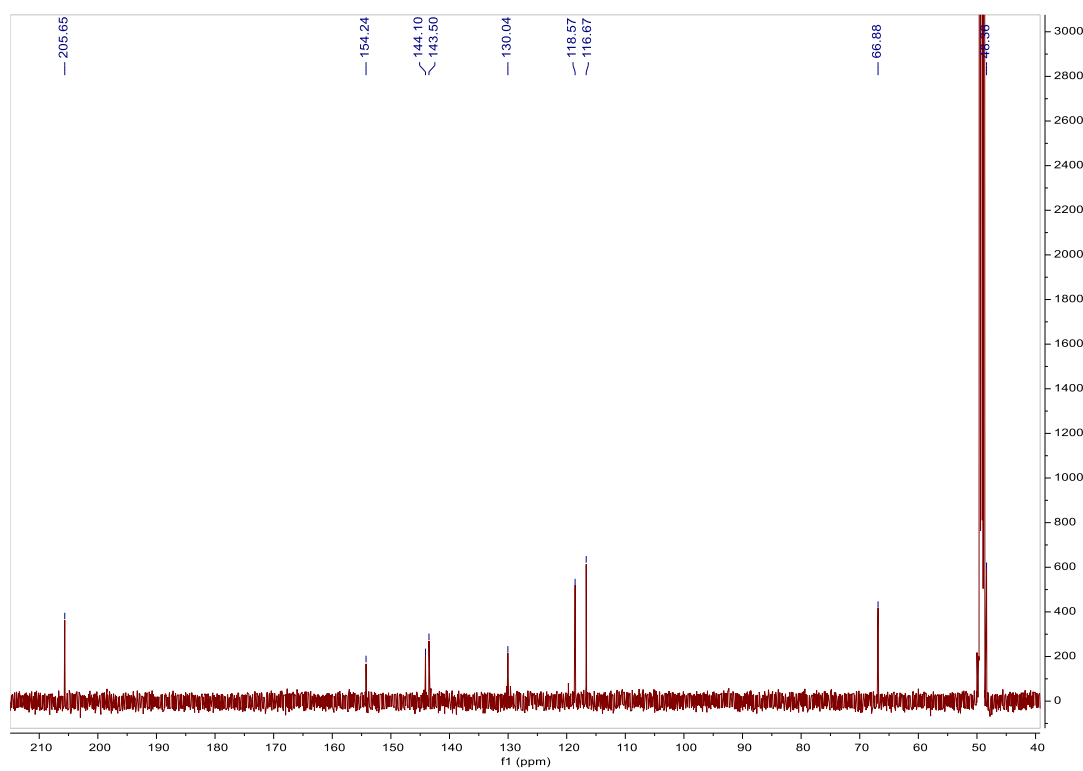

Figure S16. <sup>13</sup>C NMR spectrum of **3** in CD<sub>3</sub>OD (150 MHz).

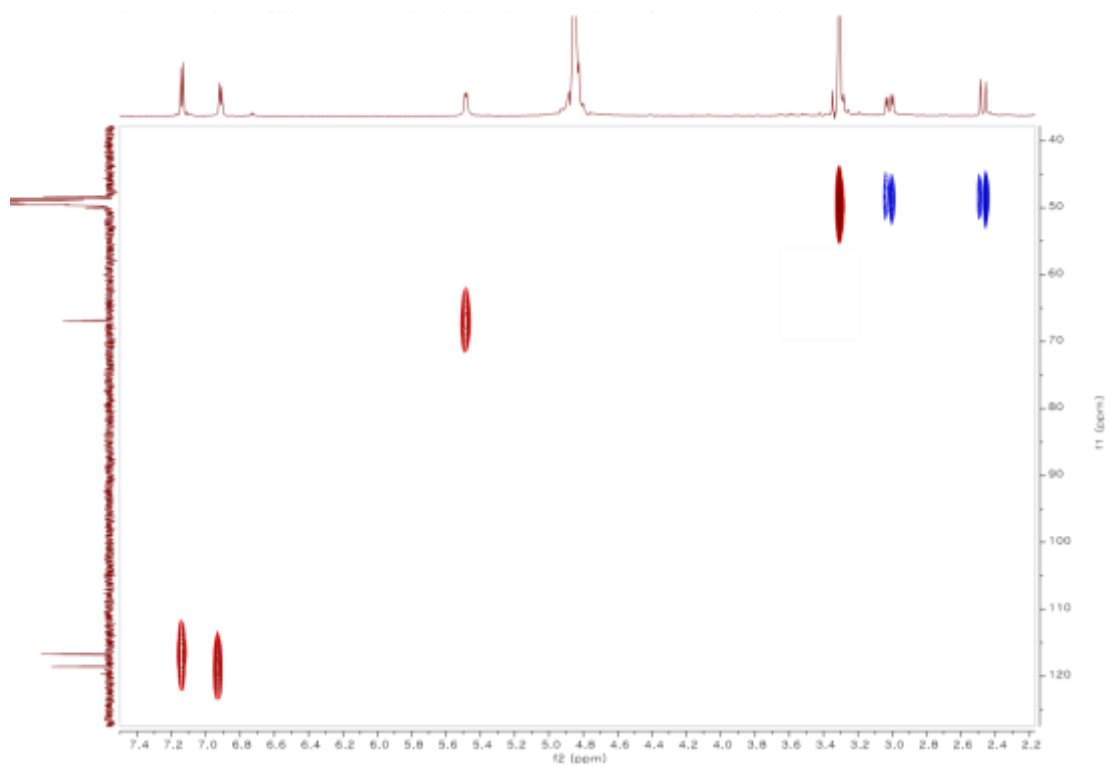

Figure S17. HSQC spectrum of **3** in CD<sub>3</sub>OD.

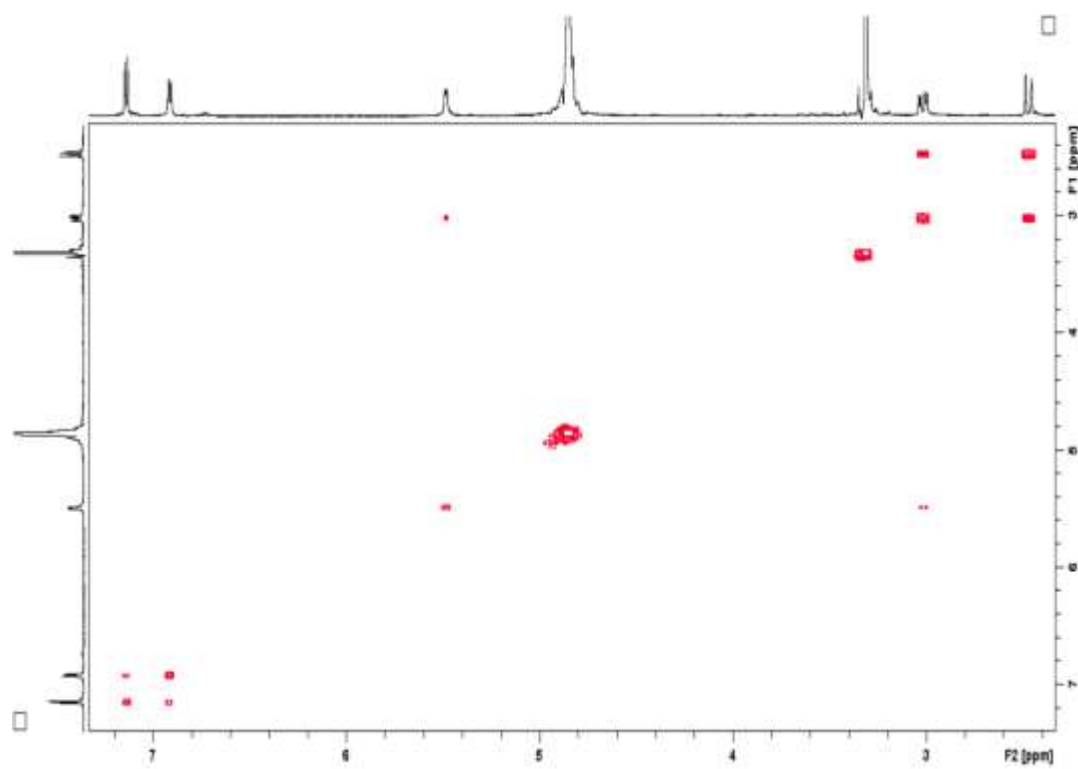

Figure S18. COSY spectrum of **3** in CD<sub>3</sub>OD.

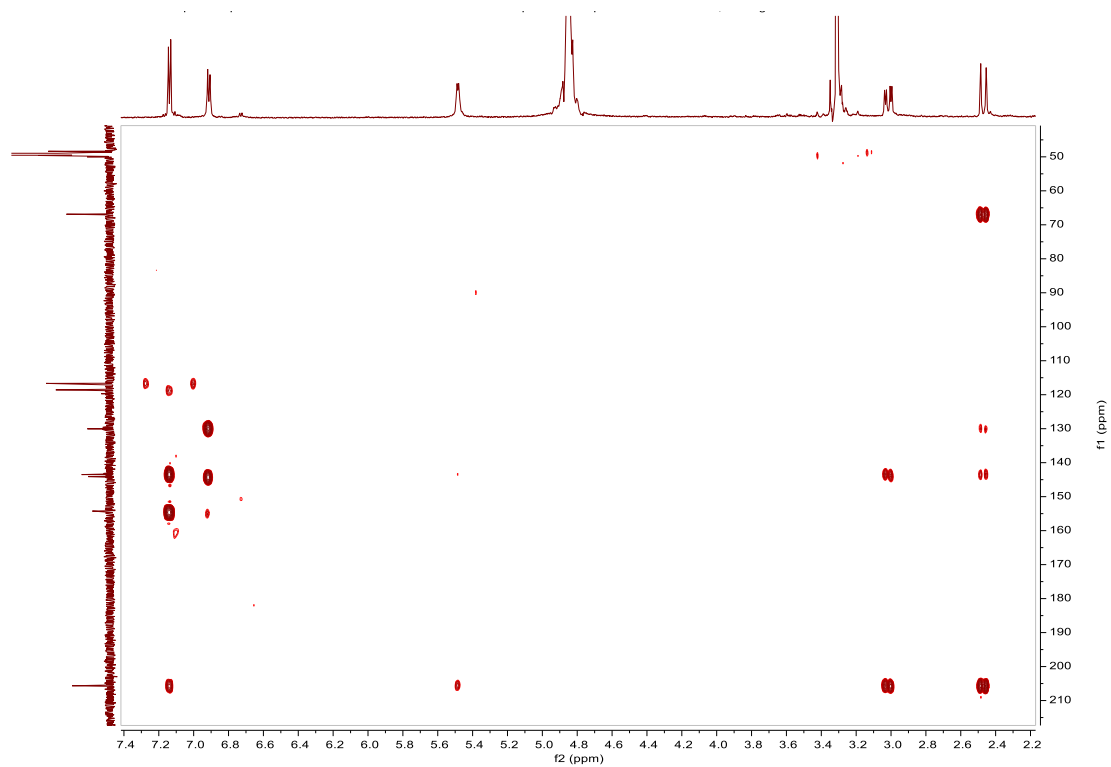

Figure S19. HMBC spectrum of **3** in CD<sub>3</sub>OD.

Sample : 03. 2308-M-A3  
 (+) ESI-MS  
 Range : 150-250 m/z

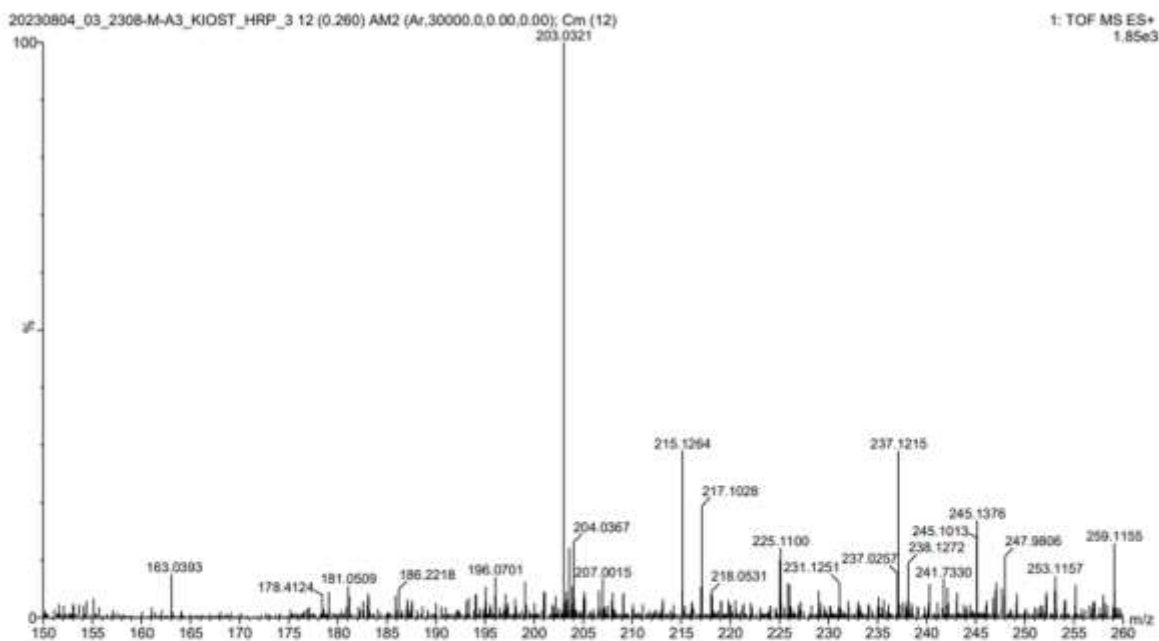

#### Elemental Composition Report

##### Single Mass Analysis

Tolerance = 10.0 PPM / DBE: min = -1.5, max = 50.0

Element prediction: Off

Number of isotope peaks used for i-FIT = 3

Monoisotopic Mass, Even Electron Ions

61 formula(e) evaluated with 1 results within limits (up to 50 closest results for each mass)

Elements Used:

C: 0-10 H: 0-300 N: 0-2 O: 0-5 Na: 0-1 Pt: 0-1

Minimum:

Maximum: 5.0 10.0 -1.5

| Mass     | Calc. Mass | mDa | PPM | DBE | i-FIT | Norm | Conf(%) | Formula     |
|----------|------------|-----|-----|-----|-------|------|---------|-------------|
| 203.0321 | 203.0320   | 0.1 | 0.5 | 5.5 | 231.7 | n/a  | n/a     | C9 H8 O4 Na |

Figure S20. HR-ESIMS spectrum of **3**.



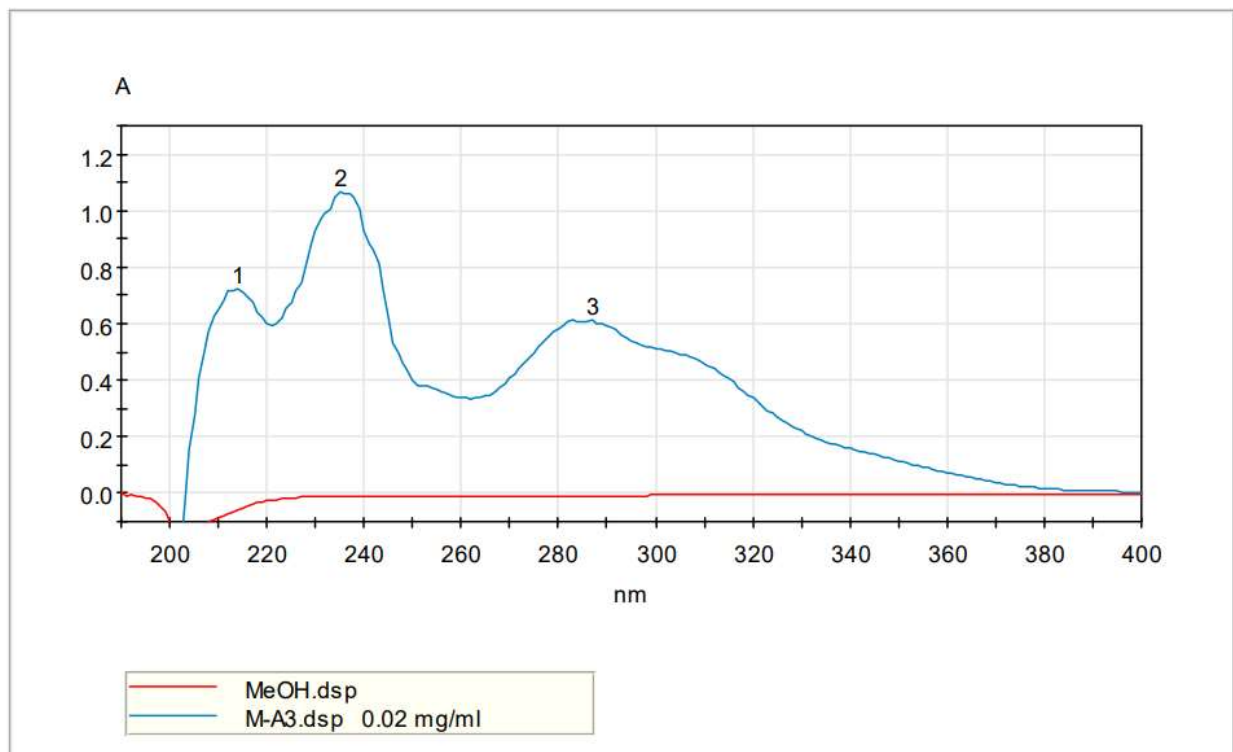

M-A3.dsp 0.02 mg/ml

| Maxima |         | Threshold: 0.1 A |                   |
|--------|---------|------------------|-------------------|
| 1      | 214 nm; | 0.725 A          | 2 235 nm; 1.068 A |
| 3      | 287 nm; | 0.613 A          |                   |

Figure S21. UV spectrum of **3**.

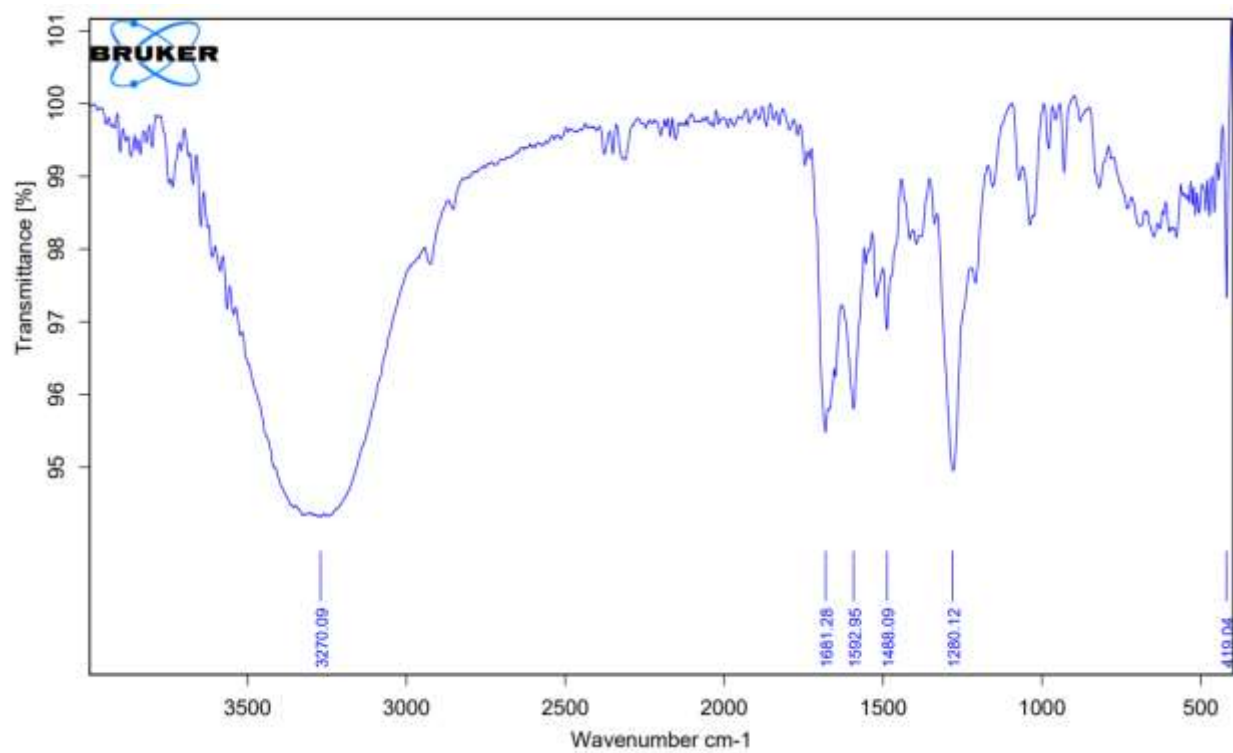

Figure S22. IR spectrum of **3**.

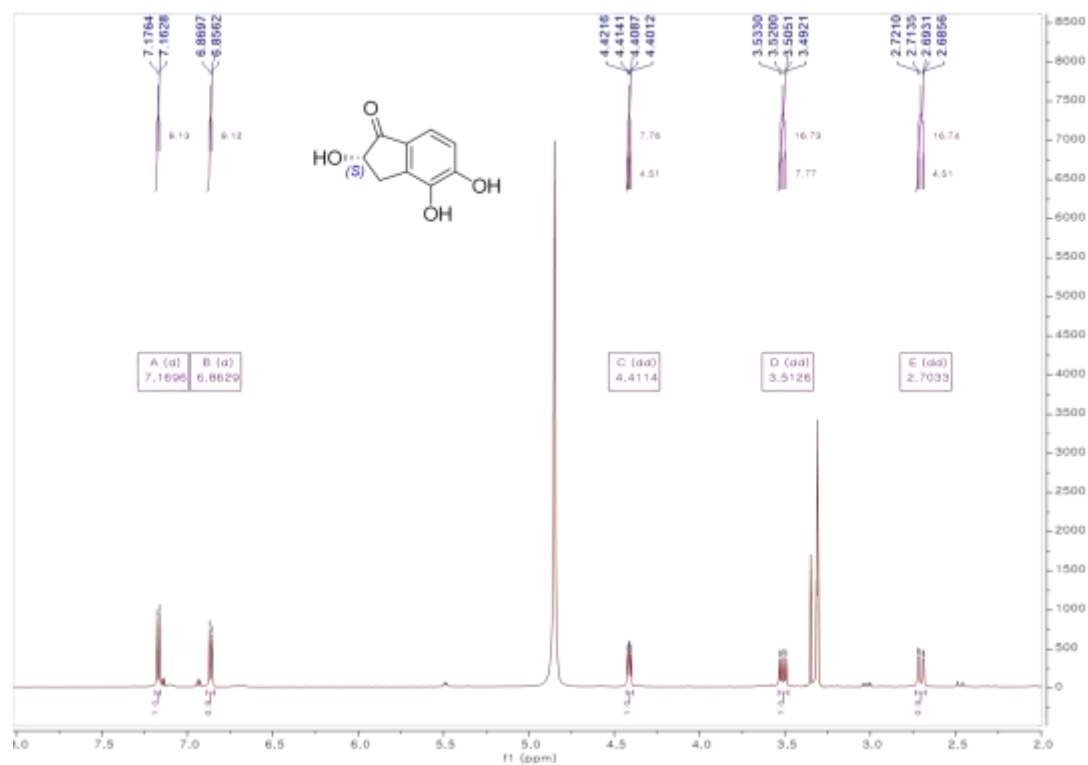

Figure S23. <sup>1</sup>H NMR spectrum of **4** in CD<sub>3</sub>OD (600 MHz).

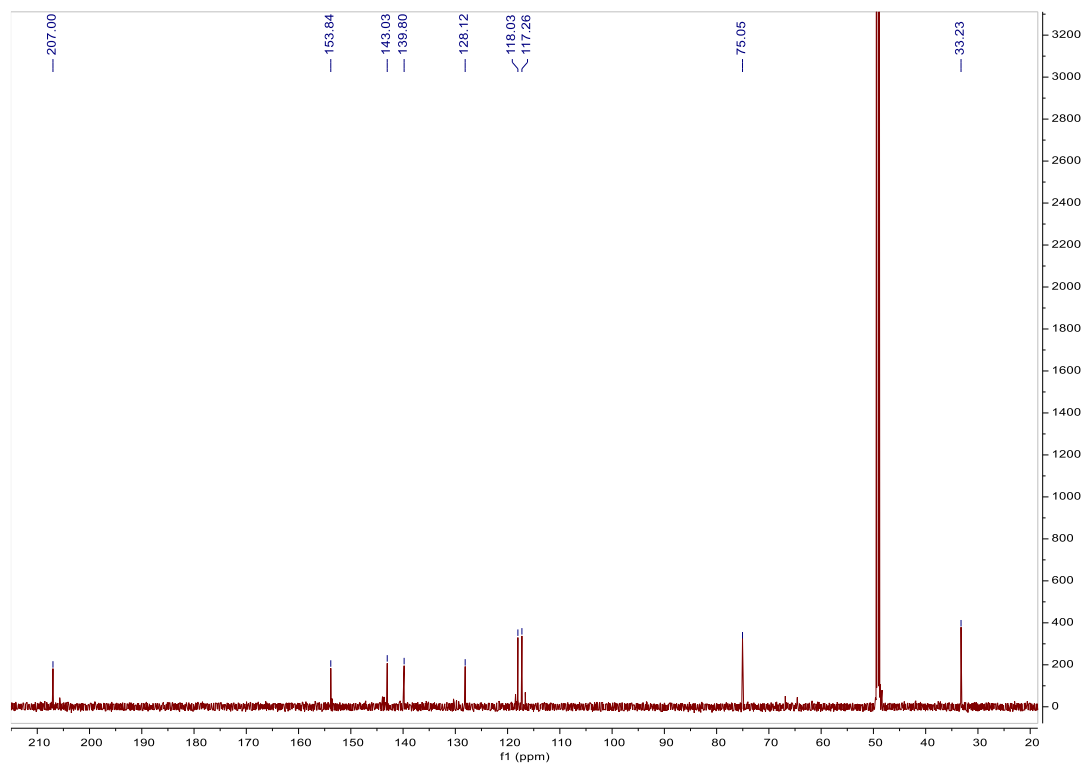

Figure S24. <sup>13</sup>C NMR spectrum of **4** in CD<sub>3</sub>OD (150 MHz).

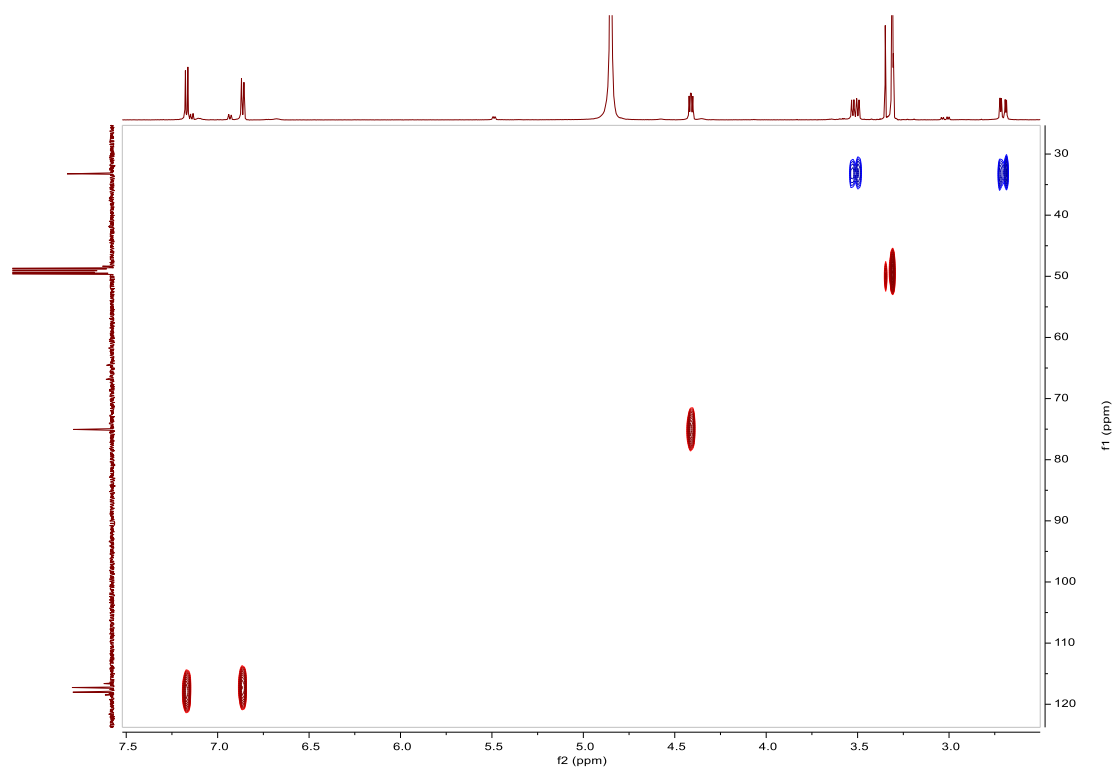

Figure S25. HSQC spectrum of **4** in  $\text{CD}_3\text{OD}$ .

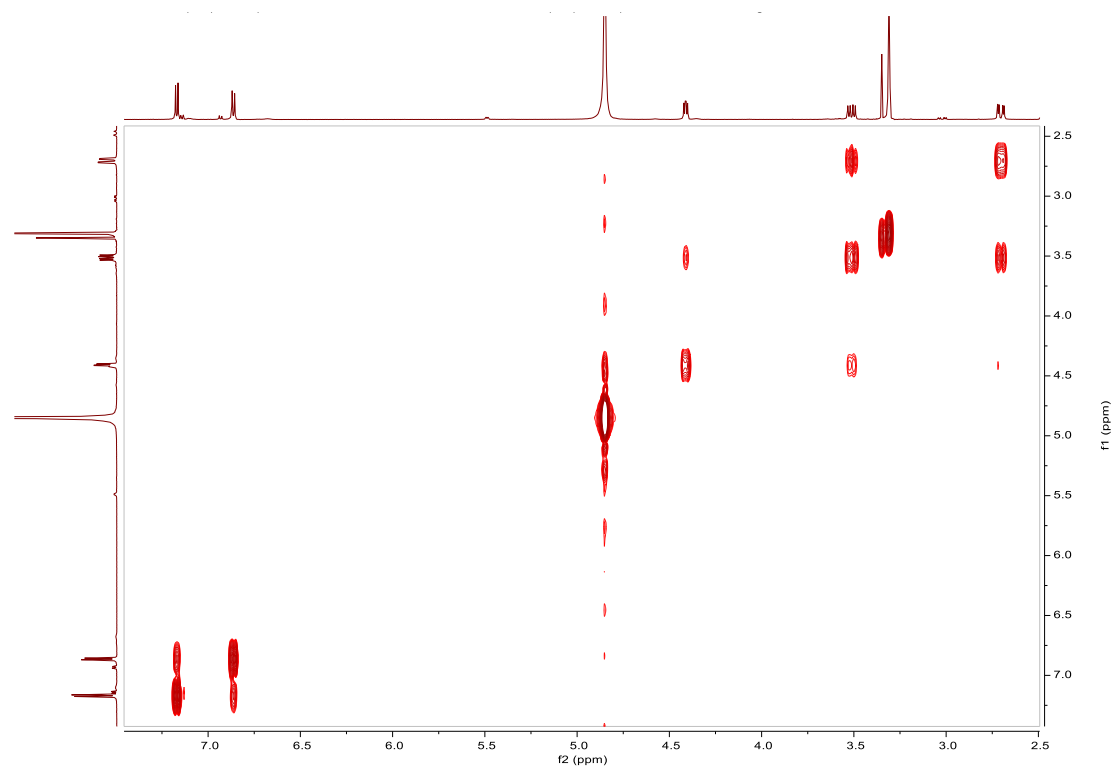

Figure S26. COSY spectrum of **4** in  $\text{CD}_3\text{OD}$ .

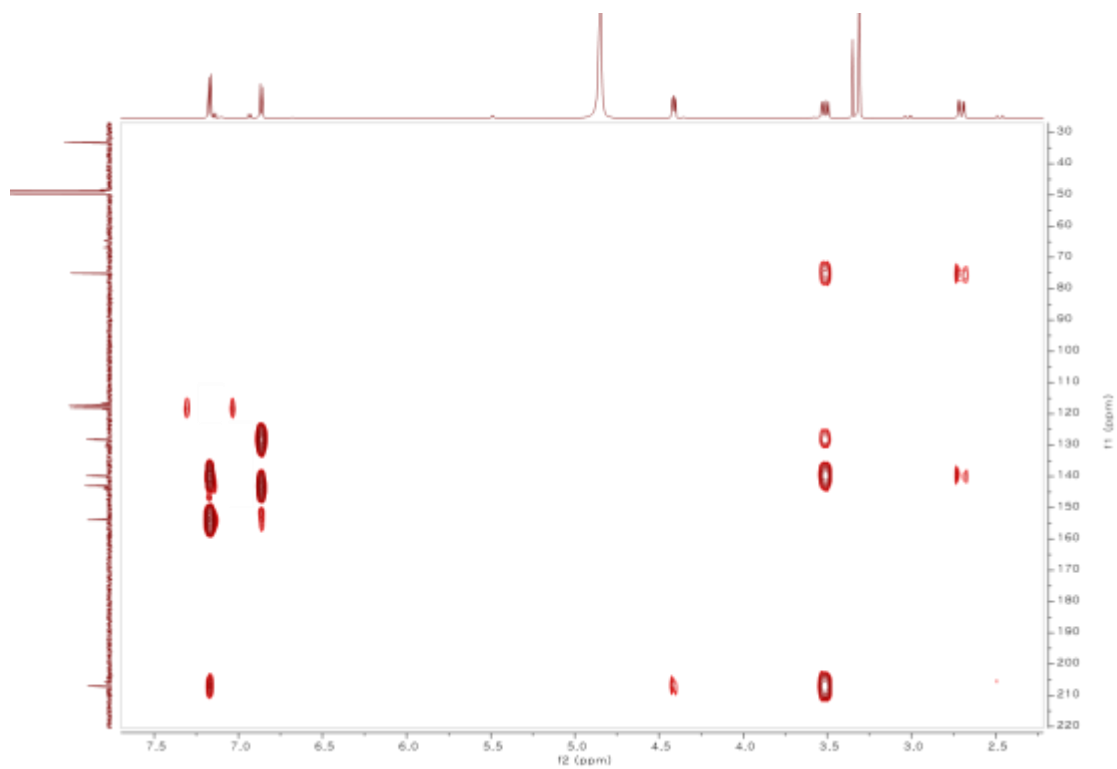

Figure S27. HMBC spectrum of **4** in  $\text{CD}_3\text{OD}$ .

Sample : 04. 2308-M-A4  
 (+) ESI-MS  
 Range : 150-260 m/z

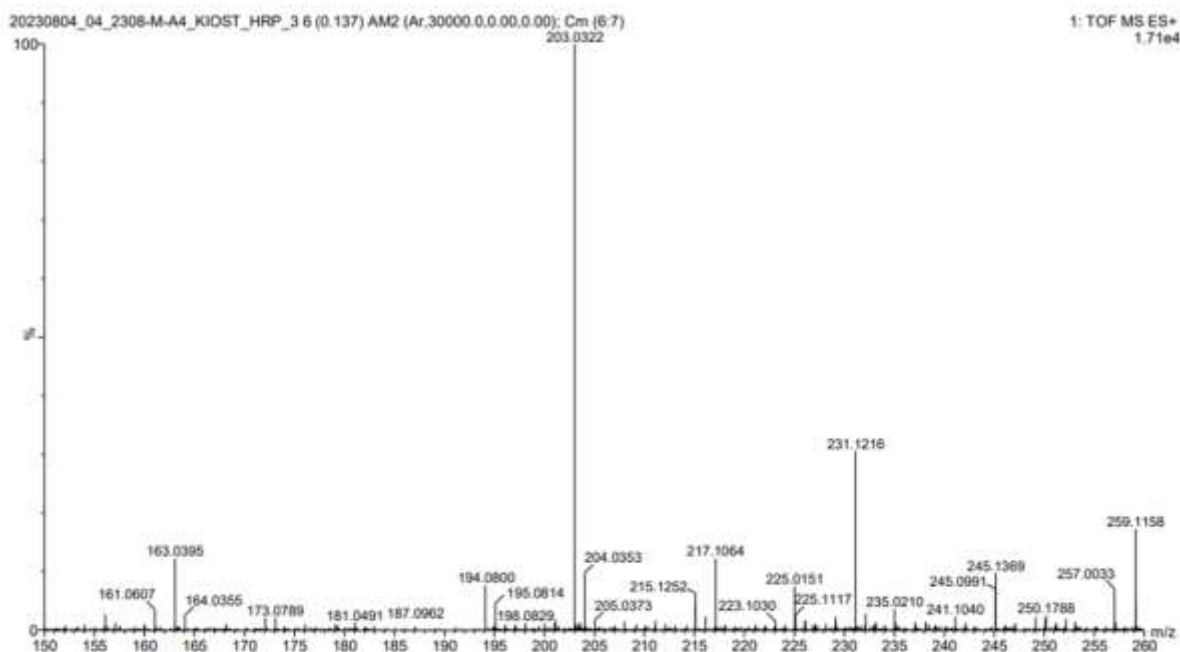

#### Elemental Composition Report

##### Single Mass Analysis

Tolerance = 10.0 PPM / DBE: min = -1.5, max = 50.0

Element prediction: Off

Number of isotope peaks used for i-FIT = 3

##### Monoisotopic Mass, Even Electron Ions

61 formula(e) evaluated with 1 results within limits (up to 50 closest results for each mass)

Elements Used:

C: 0-10 H: 0-300 N: 0-2 O: 0-5 Na: 0-1 Pt: 0-1

|          |            |     |     |      |       |      |         |             |
|----------|------------|-----|-----|------|-------|------|---------|-------------|
| Minimum: |            |     |     |      | -1.5  |      |         |             |
| Maximum: |            |     | 5.0 | 10.0 | 50.0  |      |         |             |
| Mass     | Calc. Mass | mDa | PPM | DBE  | i-FIT | Norm | Conf(%) | Formula     |
| 203.0322 | 203.0320   | 0.2 | 1.0 | 5.5  | 652.1 | n/a  | n/a     | C9 H8 O4 Na |

Figure S28. HR-ESIMS spectrum of **4**.

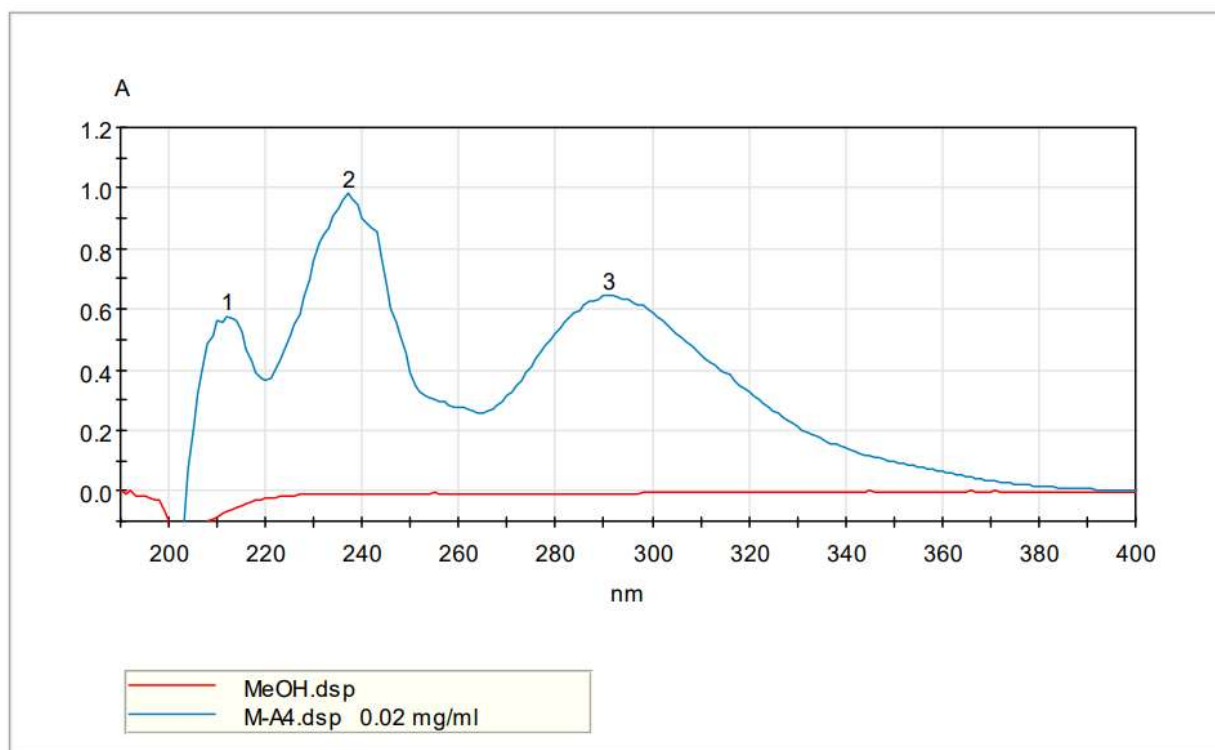

M-A4.dsp      0.02 mg/ml

Maxima      Threshold: 0.1 A  
1 212 nm;      0.578 A      2 237 nm;      0.983 A      3 291 nm;      0.647 A

Figure S29. UV spectrum of 4.

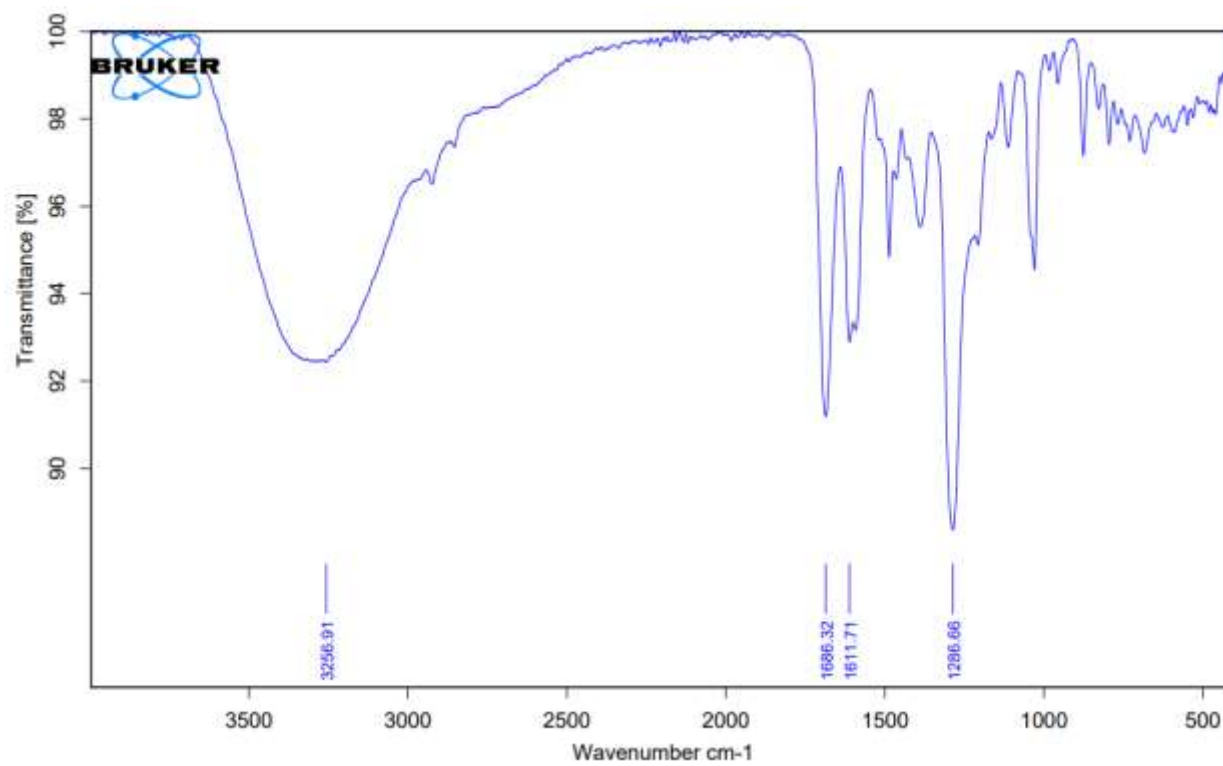

Figure S30. IR spectrum of **4**.



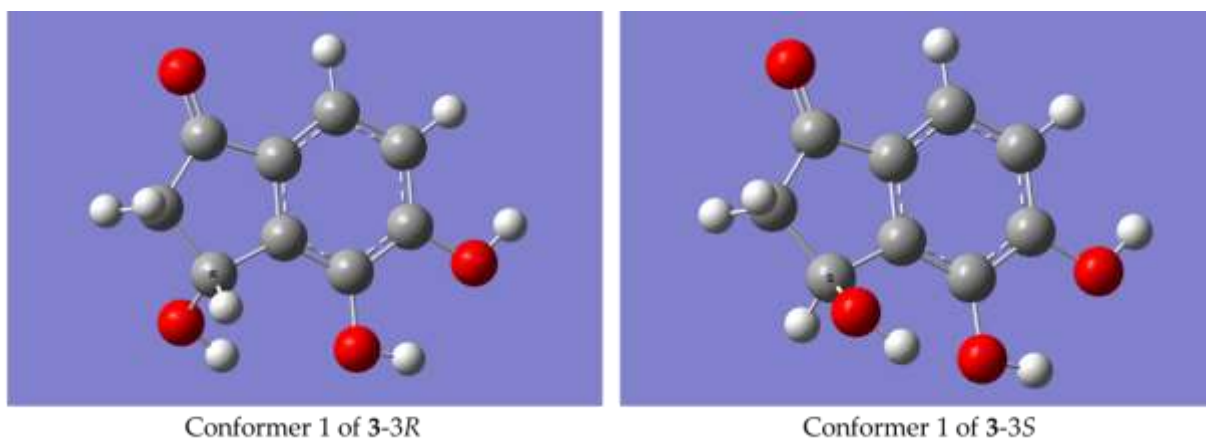

Figure S31. Initial geometry optimized conformers of **3**.

Table S1. Total Gibbs Free Energy and Boltzmann population of initial geometry optimized conformers of **3**.

| Compound    | Conformer | Total Gibbs Free Energy (KCAL/MOL) | Boltzmann population (%) |
|-------------|-----------|------------------------------------|--------------------------|
| <b>3-3R</b> | 1         | 86.85337                           | 99.98721                 |
| <b>3-3S</b> | 1         | 86.85337                           | 99.98721                 |

Table S2. The cartesian coordinates of conformers of **3**.

|                            |   | Coordinates (Angstroms) |          |          |                            |   | Coordinates (Angstroms) |          |          |
|----------------------------|---|-------------------------|----------|----------|----------------------------|---|-------------------------|----------|----------|
|                            |   | X                       | Y        | Z        |                            |   | X                       | Y        | Z        |
| Conformer 1 of <b>3-3R</b> | C | -0.13935                | 0.35933  | -0.15283 | Conformer 1 of <b>3-3S</b> | C | 0.13934                 | 0.35935  | -0.15269 |
|                            | C | 1.22404                 | 0.58074  | -0.12869 |                            | C | -1.22404                | 0.58079  | -0.12858 |
|                            | C | 2.07715                 | -0.51859 | 0.02033  |                            | C | -2.0772                 | -0.51851 | 0.02041  |
|                            | C | 1.56865                 | -1.81474 | 0.14007  |                            | C | -1.56873                | -1.81469 | 0.14013  |
|                            | C | 0.19733                 | -2.03407 | 0.11963  |                            | C | -0.19741                | -2.03405 | 0.11972  |
|                            | C | -0.64369                | -0.93326 | -0.02294 |                            | C | 0.64364                 | -0.93326 | -0.02279 |
|                            | H | 2.2602                  | -2.64382 | 0.25386  |                            | H | -2.26034                | -2.64373 | 0.25381  |
|                            | H | -0.20618                | -3.0356  | 0.21872  |                            | H | 0.20607                 | -3.03559 | 0.21876  |
|                            | C | -2.52303                | 0.59145  | -0.11556 |                            | C | 2.52305                 | 0.59133  | -0.11576 |
|                            | C | -2.11533                | -0.87483 | -0.04662 |                            | C | 2.11527                 | -0.8749  | -0.04665 |
|                            | O | -2.88715                | -1.81987 | -0.01033 |                            | O | 2.88705                 | -1.81998 | -0.01036 |
|                            | O | 1.70662                 | 1.85003  | -0.24188 |                            | O | -1.70654                | 1.8501   | -0.2417  |
|                            | O | 3.40294                 | -0.2145  | 0.03601  |                            | O | -3.40294                | -0.21443 | 0.0358   |
|                            | H | 2.6748                  | 1.83643  | -0.19793 |                            | H | -2.67475                | 1.83646  | -0.19865 |
|                            | H | 3.95222                 | -1.0034  | 0.13717  |                            | H | -3.95227                | -1.00332 | 0.1367   |
|                            | H | -3.266                  | 0.74618  | -0.90068 |                            | H | 3.26587                 | 0.74596  | -0.90105 |
|                            | H | -2.98227                | 0.87118  | 0.83818  |                            | H | 2.98247                 | 0.87115  | 0.83786  |
|                            | C | -1.23005                | 1.39211  | -0.3165  |                            | C | 1.23007                 | 1.39208  | -0.3165  |
|                            | H | -1.18955                | 1.82497  | -1.32352 |                            | H | 1.18941                 | 1.8249   | -1.32354 |
|                            | O | -1.15192                | 2.43797  | 0.64824  |                            | O | 1.15219                 | 2.43795  | 0.64822  |
|                            | H | -0.30135                | 2.88635  | 0.5365   |                            | H | 0.30157                 | 2.88633  | 0.53672  |

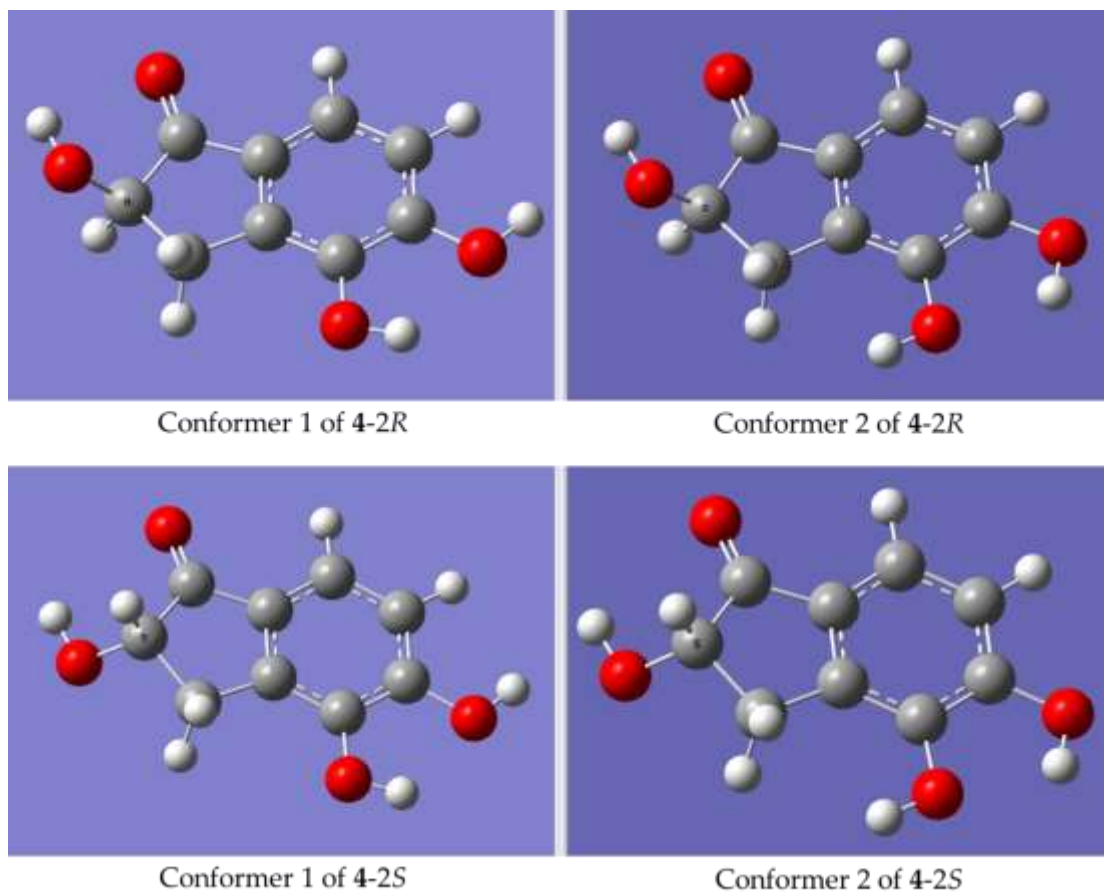

Figure S32. Initial geometry optimized conformers of **4**.

Table S3. Total Gibbs Free Energy and Boltzmann population of initial geometry optimized conformers of **4**.

| Compound | Conformers | Total Gibbs Free Energy<br>(KCAL/MOL) | Boltzmann population<br>(%) |
|----------|------------|---------------------------------------|-----------------------------|
| 4-2R     | 1          | 119.3421                              | 83.75961                    |
|          | 2          | 120.2777                              | 16.14874                    |
| 4-2S     | 1          | 119.3421                              | 83.75961                    |
|          | 2          | 120.2777                              | 16.14874                    |

Table S4. The cartesian coordinates of conformers of 4.

|                     |   | Coordinates (Angstroms) |          |          |                     |   | Coordinates (Angstroms) |          |          |
|---------------------|---|-------------------------|----------|----------|---------------------|---|-------------------------|----------|----------|
|                     |   | X                       | Y        | Z        |                     |   | X                       | Y        | Z        |
| Conformer 1 of 4-2R | C | -0.06733                | -0.51437 | 0.04284  | Conformer 1 of 4-2S | C | 0.06733                 | -0.51437 | 0.04284  |
|                     | C | -1.42593                | -0.76952 | 0.00497  |                     | C | 1.42593                 | -0.76952 | 0.00497  |
|                     | C | -2.3109                 | 0.3163   | -0.02761 |                     | C | 2.3109                  | 0.3163   | -0.02761 |
|                     | C | -1.85078                | 1.63557  | -0.02646 |                     | C | 1.85078                 | 1.63557  | -0.02646 |
|                     | C | -0.48834                | 1.89374  | 0.00949  |                     | C | 0.48834                 | 1.89374  | 0.00949  |
|                     | C | 0.38668                 | 0.81046  | 0.05192  |                     | C | -0.38668                | 0.81046  | 0.05192  |
|                     | H | -2.57061                | 2.44789  | -0.051   |                     | H | 2.57061                 | 2.44789  | -0.051   |
|                     | H | -0.11499                | 2.91178  | 0.0144   |                     | H | 0.11499                 | 2.91178  | 0.0144   |
|                     | C | 2.28939                 | -0.64388 | 0.37068  |                     | C | -2.28939                | -0.64388 | 0.37068  |
|                     | C | 1.84886                 | 0.7967   | 0.09485  |                     | C | -1.84886                | 0.7967   | 0.09485  |
|                     | O | 2.63487                 | 1.71834  | -0.0626  |                     | O | -2.63487                | 1.71834  | -0.0626  |
|                     | O | 3.42835                 | -1.00697 | -0.37827 |                     | O | 1.88836                 | -2.04924 | -0.01138 |
|                     | H | 4.05832                 | -0.27227 | -0.32996 |                     | O | 3.62656                 | -0.02718 | -0.06452 |
|                     | O | -1.88836                | -2.04924 | -0.01138 |                     | H | 2.85715                 | -2.03781 | -0.03804 |
|                     | O | -3.62656                | -0.02718 | -0.06452 |                     | H | 4.2009                  | 0.74925  | -0.10249 |
|                     | H | -2.85715                | -2.03781 | -0.03804 |                     | O | -3.42835                | -1.00697 | -0.37827 |
|                     | H | -4.2009                 | 0.74925  | -0.10249 |                     | H | -4.05832                | -0.27227 | -0.32996 |
|                     | H | 2.50444                 | -0.70149 | 1.44869  |                     | H | -2.50444                | -0.70149 | 1.44869  |
|                     | C | 1.06673                 | -1.50829 | 0.04336  |                     | C | -1.06673                | -1.50829 | 0.04336  |
|                     | H | 0.91312                 | -2.32073 | 0.75668  |                     | H | -1.19107                | -1.95649 | -0.94826 |
|                     | H | 1.19107                 | -1.95649 | -0.94826 |                     | H | -0.91312                | -2.32073 | 0.75668  |
| Conformer 2 of 4-2R | C | -0.07855                | -0.509   | 0.04886  | Conformer 2 of 4-2S | C | 0.07855                 | -0.509   | 0.04886  |
|                     | C | -1.43978                | -0.74557 | 0.0056   |                     | C | 1.43978                 | -0.74557 | 0.0056   |
|                     | C | -2.32037                | 0.34504  | -0.02926 |                     | C | 2.32037                 | 0.34504  | -0.02926 |
|                     | C | -1.84608                | 1.65901  | -0.02737 |                     | C | 1.84608                 | 1.65901  | -0.02737 |
|                     | C | -0.48249                | 1.90336  | 0.00939  |                     | C | 0.48249                 | 1.90336  | 0.00939  |
|                     | C | 0.38567                 | 0.81404  | 0.05435  |                     | C | -0.38567                | 0.81404  | 0.05435  |
|                     | H | -2.56723                | 2.46816  | -0.05611 |                     | H | 2.56723                 | 2.46816  | -0.05611 |
|                     | H | -0.09809                | 2.9174   | 0.01233  |                     | H | 0.09809                 | 2.9174   | 0.01233  |
|                     | C | 2.28301                 | -0.64686 | 0.37229  |                     | C | -2.28301                | -0.64686 | 0.37229  |
|                     | C | 1.84564                 | 0.79422  | 0.09605  |                     | C | -1.84564                | 0.79422  | 0.09605  |
|                     | O | 2.63639                 | 1.71192  | -0.06279 |                     | O | -2.63639                | 1.71192  | -0.06279 |
|                     | O | 3.41081                 | -1.01801 | -0.38898 |                     | O | 2.03823                 | -1.97503 | -0.01278 |
|                     | H | 4.04289                 | -0.28422 | -0.35405 |                     | O | 3.65568                 | 0.12767  | -0.07231 |
|                     | O | -2.03823                | -1.97503 | -0.01278 |                     | H | 1.39376                 | -2.69297 | -0.0547  |
|                     | O | -3.65568                | 0.12767  | -0.07231 |                     | H | 3.82526                 | -0.82755 | -0.08087 |
|                     | H | -1.39376                | -2.69297 | -0.0547  |                     | O | -3.41081                | -1.01801 | -0.38898 |
|                     | H | -3.82526                | -0.82755 | -0.08087 |                     | H | -4.04289                | -0.28422 | -0.35405 |
|                     | H | 2.50932                 | -0.70431 | 1.44763  |                     | H | -2.50932                | -0.70431 | 1.44763  |
|                     | C | 1.0548                  | -1.50898 | 0.05723  |                     | C | -1.0548                 | -1.50898 | 0.05723  |
|                     | H | 0.91406                 | -2.31106 | 0.78661  |                     | H | -1.18072                | -1.96935 | -0.92875 |
|                     | H | 1.18072                 | -1.96935 | -0.92875 |                     | H | -0.91406                | -2.31106 | 0.78661  |
